# Supplementary material for: Genetic Variation of Native <em>Perilla</em> Germplasms Collected from South Korea Using SSR Markers and Morphological Characteristics
Source: Preprints.org preprint supplement (doi:10.20944/preprints202107.0509.v1), 2021-07-22
Supplement: Supplementary file 2 [file Supplement Fig 2.docx]

**Supplement Fig. 2.**
