# Supplementary material for: Genetic Variation of Native <em>Perilla</em> Germplasms Collected from South Korea Using SSR Markers and Morphological Characteristics
Source: Preprints.org preprint supplement (doi:10.20944/preprints202107.0509.v1), 2021-07-22
Supplement: Supplementary file 5 [file Supplement Table 2.docx]

Supplement Table 2**.** Collection sites of *Perilla* accessions in the five regions of South Korea and other region.

| IT No. | Village, town or city | Region |  | IT No. | Village, town or city | Region |  |
| --- | --- | --- | --- | --- | --- | --- | --- |
| 105833 | Hwaseong-si | Gyeonggi-do |  | 103368 | Boseong-gun | Jeollanam-do |  |
| 112819 | Hwaseong-si | Gyeonggi-do |  | 103913 | Namwon-si | Jeollanam-do |  |
| 112893 | Paju-si | Gyeonggi-do |  | 104232 | Sunchang-gun | Jeollabuk-do |  |
| 113100 | Suwon-si | Gyeonggi-do |  | 104261 | Namwon-si | Jeollabuk-do |  |
| 116994 | Hwaseong-si | Gyeonggi-do |  | 104382 | Namwon-si | Jeollabuk-do |  |
| 116995 | Hwaseong-si | Gyeonggi-do |  | 104849 | Gunsa-si | Jeollabuk-do |  |
| 116996 | Hwaseong-si | Gyeonggi-do |  | 105242 | Imsil-gun | Jeollabuk-do |  |
| 116998 | Hwaseong-si | Gyeonggi-do |  | 105275 | Imsil-gun | Jeollabuk-do |  |
| 116999 | Hwaseong-si | Gyeonggi-do |  | 105386 | Namwon-si | Jeollabuk-do |  |
| 117000 | Hwaseong-si | Gyeonggi-do |  | 105700 | Jangsu-gun | Jeollabuk-do |  |
| 117004 | Suwon-si | Gyeonggi-do |  | 105843 | Imsil-gun- | Jeollabuk-do |  |
| 117005 | Suwon-si | Gyeonggi-do |  | 105873 | Namwon-si | Jeollabuk-do |  |
| 117006 | Suwon-si | Gyeonggi-do |  | 105990 | Gokseong-gun | Jeollanam-do |  |
| 117008 | Suwon-si | Gyeonggi-do |  | 109136 | Jinan-gun | Jeollabuk-do |  |
| 117009 | Suwon-si | Gyeonggi-do |  | 109580 | Boseong-gun | Jeollanam-do |  |
| 117010 | Suwon-si | Gyeonggi-do |  | 109582 | Boseong-gun | Jeollanam-do |  |
| 117096 | Paju-si | Gyeonggi-do |  | 111021 | Gochang-gun | Jeollabuk-do |  |
| 117203 | Yongin-si | Gyeonggi-do |  | 111050 | Gochang-gun | Jeollabuk-do |  |
| 117207 | Suwon-si | Gyeonggi-do |  | 111080 | Gochang-gun | Jeollabuk-do |  |
| 103282 | Samcheok-shi | Gangwon-do |  | 111132 | Hamyang-gun | Jeollanam-do |  |
| 104486 | Jeongseon-gun | Gangwon-do |  | 113014 | Jeongeup-si | Jeollabuk-do |  |
| 104507 | Pyeongchang-gun | Gangwon-do |  | 113384 | Gochang-gun | Jeollabuk-do |  |
| 104516 | Pyeongchang-gun | Gangwon-do |  | 117052 | Gwangju-si | Jeollabuk-do |  |
| 104597 | Pyeongchang-gun | Gangwon-do |  | 117053 | Gwangju-si | Jeollabuk-do |  |
| 104623 | Hongcheon-gun | Gangwon-do |  | 117054 | Gwangju-si | Jeollabuk-do |  |
| 105306 | Chuncheon-si | Gangwon-do |  | 117055 | Gwangju-si | Jeollabuk-do |  |
| 105790 | Gangneung-si | Gangwon-do |  | 117056 | Gwangju-si | Jeollabuk-do |  |
| 117176 | Chuncheon-si | Gangwon-do |  | 117059 | Namwon-si | Jeollabuk-do |  |
| 117178 | Chuncheon-si | Gangwon-do |  | 117061 | Namwon-si | Jeollabuk-do |  |
| 137611 | Yangyang-gun | Gangwon-do |  | 117062 | Sunchang-gun | Jeollabuk-do |  |
| 137612 | Yangyang-gun | Gangwon-do |  | 117148 | Namwon-si | Jeollanam-do |  |
| 137613 | Yangyang-gun | Gangwon-do |  | 117149 | Namwon-si | Jeollanam-do |  |
| 105964 | Yesan-gun | Chungcheongnam-do |  | 117179 | Gwangju-si | Jeollabuk-do |  |
| 105965 | Yesan-gun | Chungcheongnam-do |  | 117180 | Gwangju-si | Jeollabuk-do |  |
| 110826 | Jecheon-si | Chungcheongbuk-do |  | 117208 | Jinan-gun | Jeollabuk-do |  |
| 113112 | Jincheon-gun | Chungcheongbuk-do |  | 117209 | Jinan-gun | Jeollabuk-do |  |
| 113136 | Jincheon-gun | Chungcheongbuk-do |  | 103164 | Ulsan-si | Gyeongsangnam-do |  |
| 117115 | Daejeon-si | Chungcheongbuk-do |  | 104071 | Sacheon-si | Gyeongsangnam-do |  |
| 117116 | Daejeon-si | Chungcheongbuk-do |  | 104088 | Gimcheon-si | Gyeongsangnam-do |  |
| 117118 | Dangjin-si | Chungcheongbuk-do |  | 104121 | Gimcheon-si | Gyeongsangnam-do |  |
| 117120 | Dangjin-si | Chungcheongbuk-do |  | 104241 | Hadong-gun | Gyeongsangnam-do |  |
| 117121 | Dangjin-si | Chungcheongbuk-do |  | 104421 | Hamyang-gun | Gyeongsangnam-do |  |
| 117123 | Cheongju-si | Chungcheongbuk-do |  | 104427 | Hadong-gun | Gyeongsangnam-do |  |
| 117125 | Cheongju-si | Chungcheongbuk-do |  | 104445 | Hamyang-gun | Gyeongsangnam-do |  |
| 117127 | Cheongju-si | Chungcheongbuk-do |  | 104635 | Seongju-gun | Gyongsangbuk-do |  |
| 117128 | Cheongju-si | Chungcheongbuk-do |  | 104669 | Seongju-gun | Gyongsangbuk-do |  |
| 117133 | Nonsan-si | Chungcheongbuk-do |  | 104754 | Hadong-gun | Gyeongsangnam-do |  |
| 117134 | Nonsan-si | Chungcheongbuk-do |  | 104761 | Gimcheon-si | Gyongsangbuk-do |  |
| 117136 | Nonsan-si | Chungcheongbuk-do |  | 104785 | Gimcheon-si | Gyongsangbuk-do |  |
| 117137 | Nonsan-si | Chungcheongbuk-do |  | 104832 | Hadong-gun | Gyeongsangnam-do |  |
| 117161 | Chungju-si | Chungcheongbuk-do |  | 104886 | Hamyang-gun | Gyeongsangnam-do |  |
| 117187 | Daejeon-si | Chungcheongbuk-do |  | 104890 | Goseong-gun | Gyeongsangnam-do |  |

Supplement Table 1. Continued

| IT No. | Village, town or city | Region |  | IT No. | Village, town or city | Region |  |
| --- | --- | --- | --- | --- | --- | --- | --- |
| 105557 | Gimcheon-si | Gyongsangbuk-do |  | 105586 | unknown | other |  |
| 105801 | Andong-si | Gyongsangbuk-do |  | 105807 | unknown | other |  |
| 105928 | Hadong-gun | Gyeongsangnam-do |  | 108937 | unknown | other |  |
| 105936 | Hadong-gun | Gyeongsangnam-do |  | 113184 | unknown | other |  |
| 105939 | Masan-si | Gyeongsangnam-do |  | 113193 | unknown | other |  |
| 108680 | Yecheon-gun | Gyongsangbuk-do |  | 117140 | unknown | other |  |
| 108761 | Yecheon-gun | Gyongsangbuk-do |  | 117141 | unknown | other |  |
| 108995 | Hadong-gun | Gyeongsangnam-do |  | 117142 | unknown | other |  |
| 110974 | Uiseong-gun | Gyongsangbuk-do |  | 117147 | unknown | other |  |
| 113199 | Gimcheon-si | Gyongsangbuk-do |  | 117156 | unknown | other |  |
| 113569 | Uiseong-gun | Gyongsangbuk-do |  | 117188 | unknown | other |  |
| 115181 | Seongju-gun | Gyongsangbuk-do |  | 117194 | unknown | other |  |
| 117011 | Daegu-si | Gyongsangbuk-do |  | 117199 | unknown | other |  |
| 117013 | Daegu-si | Gyongsangbuk-do |  | 117210 | unknown | other |  |
| 117014 | Daegu-si | Gyongsangbuk-do |  | 157402 | unknown | other |  |
| 117015 | Daegu-si | Gyongsangbuk-do |  | 157406 | unknown | other |  |
| 117016 | Daegu-si | Gyongsangbuk-do |  | 157409 | unknown | other |  |
| 117017 | Daegu-si | Gyongsangbuk-do |  | 157412 | unknown | other |  |
| 117018 | Daegu-si | Gyongsangbuk-do |  | 157413 | unknown | other |  |
| 117019 | Daegu-si | Gyongsangbuk-do |  | 157419 | unknown | other |  |
| 117023 | Daegu-si | Gyongsangbuk-do |  | 157421 | unknown | other |  |
| 117024 | Daegu-si | Gyongsangbuk-do |  | 157424 | unknown | other |  |
| 117026 | Daegu-si | Gyongsangbuk-do |  | 157425 | unknown | other |  |
| 117027 | Chilgok-gun | Gyongsangbuk-do |  | 157427 | unknown | other |  |
| 117031 | Chilgok-gun | Gyongsangbuk-do |  | 157430 | unknown | other |  |
| 117032 | Chilgok-gun | Gyongsangbuk-do |  | 157431 | unknown | other |  |
| 117033 | Chilgok-gun | Gyongsangbuk-do |  | 157435 | unknown | other |  |
| 117035 | Chilgok-gun | Gyongsangbuk-do |  | 157437 | unknown | other |  |
| 117037 | Chilgok-gun | Gyongsangbuk-do |  | 157441 | unknown | other |  |
| 117038 | Chilgok-gun | Gyongsangbuk-do |  | 157446 | unknown | other |  |
| 117039 | Chilgok-gun | Gyongsangbuk-do |  | 157454 | unknown | other |  |
| 117040 | Chilgok-gun | Gyongsangbuk-do |  | 157458 | unknown | other |  |
| 117041 | Chilgok-gun | Gyongsangbuk-do |  | 157461 | unknown | other |  |
| 117047 | Pohang-si | Gyongsangbuk-do |  | 157462 | unknown | other |  |
| 117049 | Pohang-si | Gyongsangbuk-do |  | 157463 | unknown | other |  |
| 117072 | Andong-si | Gyongsangbuk-do |  | 157464 | unknown | other |  |
| 117078 | Chilgok-gun | Gyongsangbuk-do |  | 157465 | unknown | other |  |
| 117079 | Andong-si | Gyongsangbuk-do |  | 157466 | unknown | other |  |
| 117090 | Yeongyang-gun | Gyongsangbuk-do |  | 157467 | unknown | other |  |
| 117091 | Yeongyang-gun | Gyongsangbuk-do |  | 157468 | unknown | other |  |
| 117093 | Yeongyang-gun | Gyongsangbuk-do |  | 157469 | unknown | other |  |
| 117101 | Yecheon-gun | Gyongsangbuk-do |  | 157474 | unknown | other |  |
| 117143 | Daegu-si | Gyongsangbuk-do |  | 157480 | unknown | other |  |
| 117144 | Daegu-si | Gyongsangbuk-do |  | 157486 | unknown | other |  |
| 117152 | Uljin-gun | Gyongsangbuk-do |  | 157488 | unknown | other |  |
| 117153 | Andong-si | Gyongsangbuk-do |  |  |  |  |  |
| 117160 | Uiseong-gun | Gyongsangbuk-do |  |  |  |  |  |
| 117195 | Daegu-si | Gyongsangbuk-do |  |  |  |  |  |
| 117201 | Uljin-gun | Gyongsangbuk-do |  |  |  |  |  |
| 117202 | Yeongyang-gun | Gyongsangbuk-do |  |  |  |  |  |
| 121520 | Sangju-si | Gyongsangbuk-do |  |  |  |  |  |
