# Supplementary material for: Genetic Variation of Native <em>Perilla</em> Germplasms Collected from South Korea Using SSR Markers and Morphological Characteristics
Source: Preprints.org preprint supplement (doi:10.20944/preprints202107.0509.v1), 2021-07-22
Supplement: Supplementary file 6 [file Supplement Table 3.docx]

Supplement Table 3. Characteristics of the 20 *Perilla* SSR loci used in the study.

| SSR loci | Forward Primer (5’-3’) | Reverse Primer (3’-5’) | Repeat motif |
| --- | --- | --- | --- |
| KNUPF1 | CTTGCAGCTGATCATTAAGCTA | TTTCTTGTGTGCTCTAACAACG | (AG)11 |
| KNUPF2 | GAAACCAAATTTCTTGTTCTTACA | CAAACGCAGACTCTTATCAATG | (AG)16 |
| KNUPF4 | TTTCAAAAATCTTACCAACGCT | TTCGTTTTTGCATCTAATTATTCA | (AT)10 |
| KNUPF5 | TCCATCTCATCTCATTCAAACA | ATGGATCGGAAATCTAAAAACA | (AT)10 |
| KNUPF10 | GCTGATGGGACTACCCATAATA | AGGATCGGAACAATTATTAGCC | (AT)11 |
| KNUPF16 | CCTGTATCTCTCCCCGATAAAT | TGGATTTAATGCAGTTGAGTTG | (CT)22 |
| KNUPF23 | TTGCAAGTTCTTGAATTGTGAC | CACTCCTTCCCTCCTCTTTAAT | (TG)11 |
| KNUPF25 | GCTTAGTGTGAGGAATTATGTAGGA | ACTCAGCATGCTTGAATTCTC | (AAG)12 |
| KNUPF26 | ATTTGAAATCGAAAAAGCAAAA | TGCAACCCTATTAGCAGTTTCT | (ACA)8 |
| KNUPF28 | CAACCTCTTAAGCCTTTGAACA | AATGTGACGGGTTCTGTAAATC | (AGA)8 |
| KNUPF33 | GCAATCTTGTGAAATGAAATGA | TGATTCCCAGCGCTACTATTAT | (CAT)8 |
| KNUPF36 | GGGAGACGAGATAACACATGAT | TGCATACTCGATTGAAAGAAGA | (GCT)8 |
| KNUPF37 | GGTGTGAAAAAGAGAGTGGAGA | TTGAATTGCCTGTTGATAGTGA | (GGT)10 |
| KNUPF39 | TCACCTTCCCCTTCATTTATTA | AGGATCGAACAGAACAAACTGT | (TCT)13 |
| KNUPF43 | GTCAAATGAAATTCACACATTTTA | GTAAATGGGAATTTTTGAGGAG | (AT)7 |
| KNUPF55 | TGCTGTTGATGACTTGTATGGT | ATGAGATTTGGCTTCACAGAGT | (AGC)7 |
| KNUPF59 | AATCTCGATGCCTAACAACAGT | TTCCTTGTAAATCCAGCTAAGG | (CAG)7 |
| KNUPF71 | GAAGAATGCATCAGTAACACGA | ATGCTGGCCAAGTAATAAGAGA | (AGCT)4 |
| KNUPF74 | TTGACTGTACCAGAGCATCAAG | GGGTACACTCACAACTCTACCAA | (AAAT)6 |
| KNUPF77 | TTTTTGGTTGCTTTTTCTTGAT | AGCAGATAAAATGTGCTGGATT | (TATG)10 |
