# Supplementary figures and images for: Genetic Variation of Native <em>Perilla</em> Germplasms Collected from South Korea Using SSR Markers and Morphological Characteristics
Source: Preprints.org preprint supplement (doi:10.20944/preprints202107.0509.v1), 2021-07-22

| **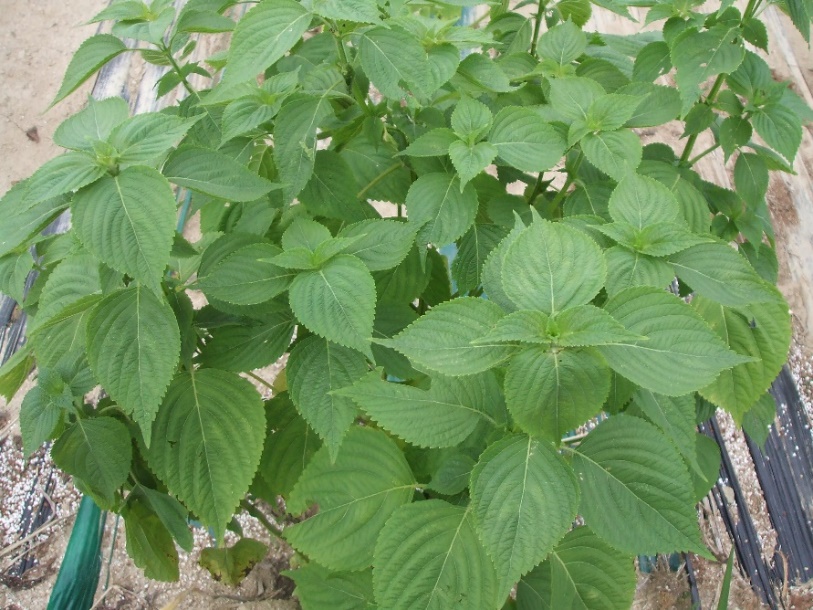** | **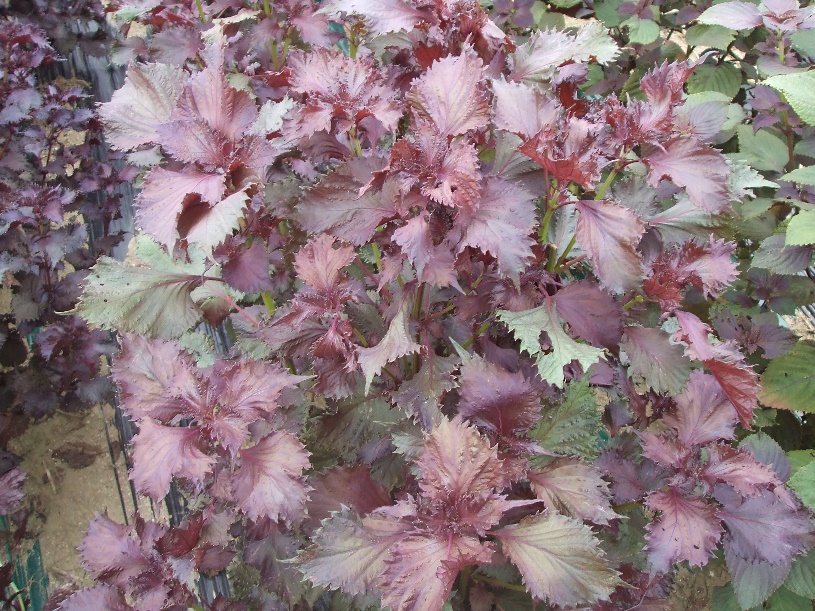** |
| --- | --- |

1. **(b)**

**Supplement Fig. 1.**

Supplement: Supplementary file 1 [file Supplement Fig 1.docx]

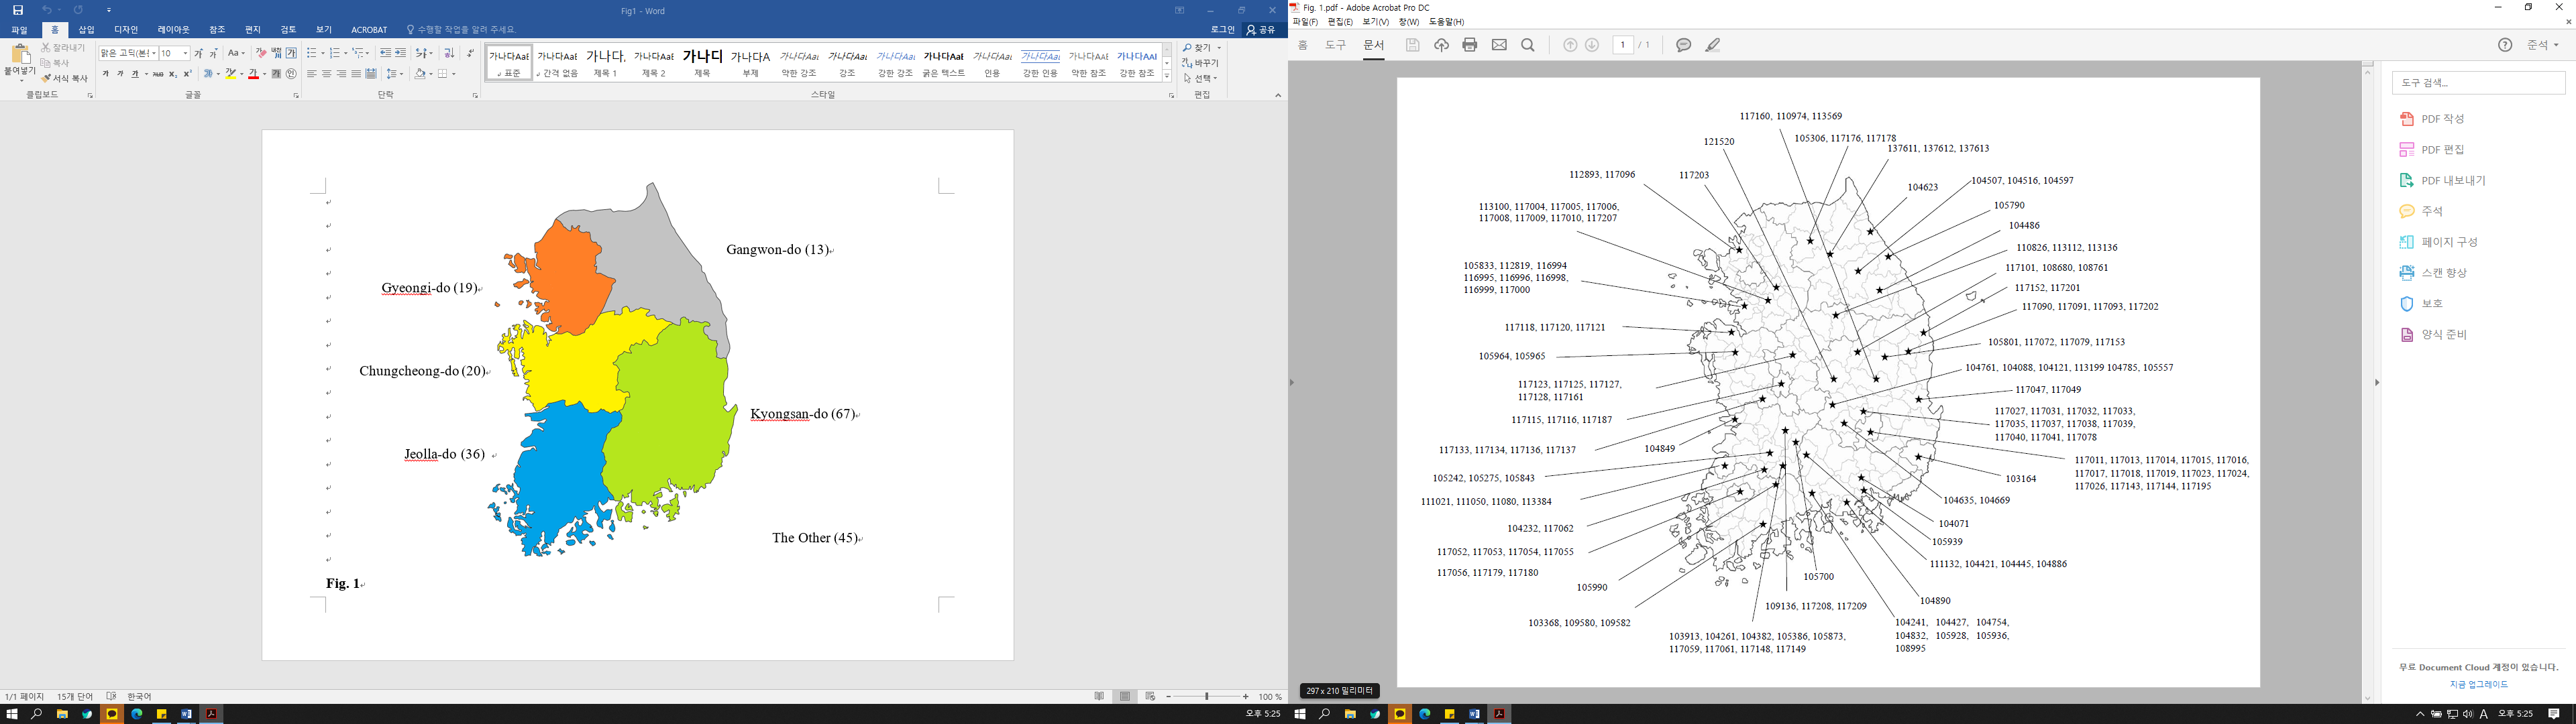


**Supplement Fig. 3**

Supplement: Supplementary file 3 [file Supplement Fig 3.docx]
